# Supplementary material for: A practical fluorometric and colorimetric dual-mode sensing platform based on two-dimensional porous organic nanosheets for rapid determination of trifluralin
Source: Royal Society of Chemistry journal article supplement (doi:10.1039/d4ay02200a), 2025-01-01
Supplement: d4ay02200a1.pdf [file d4ay02200a1.pdf]

**A practical fluorometric and colorimetric dual-mode sensing  
platform based on two-dimensional porous organic nanosheets for  
rapid determination of trifluralin**

Xue Liu,<sup>ab</sup> Zhenyu Lu,<sup>\*a</sup> Shijun Huang,<sup>b</sup> Na Chen,<sup>a</sup> Xue Xiao,<sup>b</sup> Xiaohui Zhu,<sup>\*bc</sup> and  
Runkun Zhang<sup>d</sup>

<sup>a</sup>School of Chemistry and Chemical Engineering, Henan Institute of Science and  
Technology, Xinxiang 453000, China

<sup>b</sup>Key Laboratory of Environmental Pollution Health Risk Assessment, South China  
Institute of Environmental Sciences, Ministry of Ecology and Environment,  
Guangzhou, 510655, PR China

<sup>c</sup>School of Environment and Energy, South China University of Technology,  
Guangzhou, 510006, PR China

<sup>d</sup>School of Public Health, Guangdong Pharmaceutical University, Guangzhou 510310,  
RP China

\*Corresponding Author

E-mail: [luzhenyu312@163.com](mailto:luzhenyu312@163.com);

[zhuxiaohui@scies.org](mailto:zhuxiaohui@scies.org)

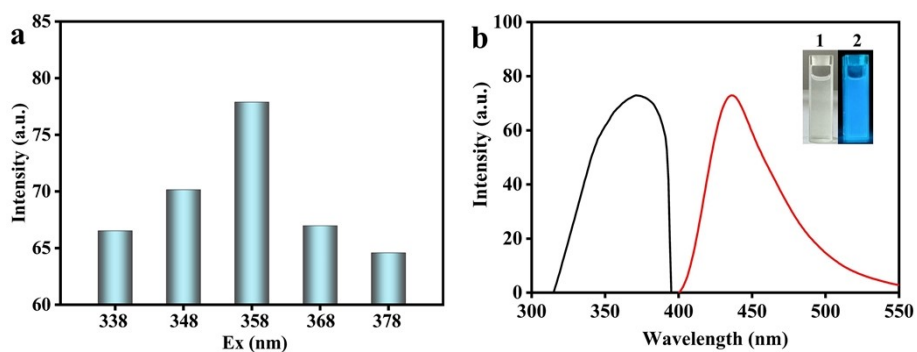

Fig.S1 (a) The emission spectra intensity of the TPA-PONs suspension at different excitation wavelengths; (b) Excitation spectrum (black curve) and emission spectrum (red curve) of the TPA-PONs suspension; Inset: photos of TPA-PONs under sunlight (left) and a 365 nm UV lamp irradiation (right)

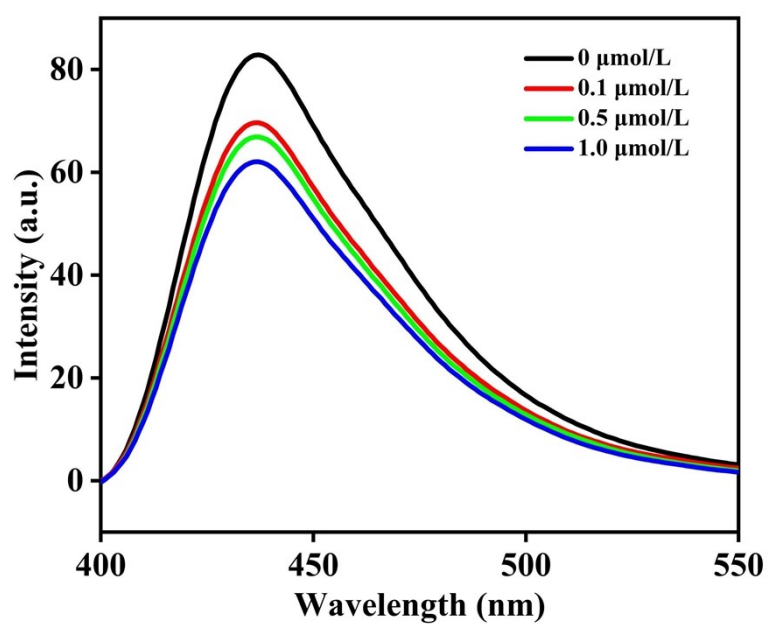

Fig.S2 Fluorescence spectra of the TPA-PONs after adding trifluralin at different concentrations ( $\lambda_{ex} = 358$  nm)

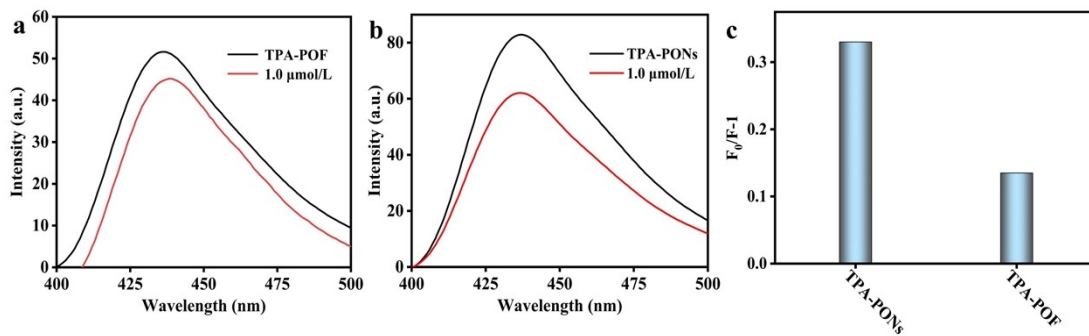

Fig.S3 Fluorescence spectra of the bulk TPA-POF (a) and TPA-PONs (b) suspension after adding trifluralin ( $\lambda_{ex} = 358$  nm); (c) The value of  $F_0/F-1$  of TPA-POF and TPA-PONs

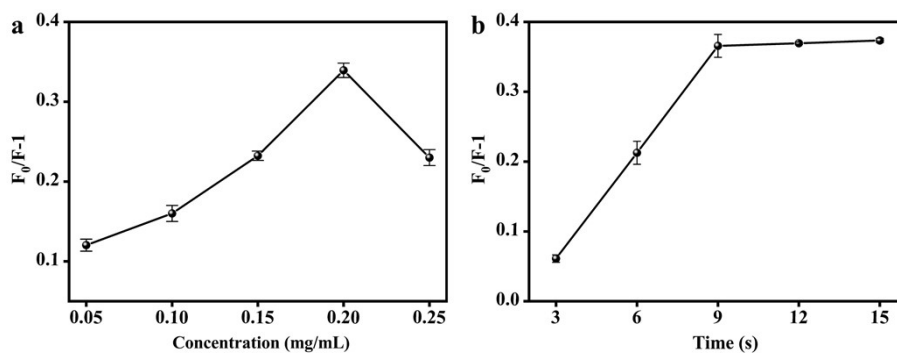

Fig.S4 The effect of suspension concentration (a) and incubation time (b) of TPA-PONs on trifluralin detection ( $\lambda_{ex} = 358$  nm)

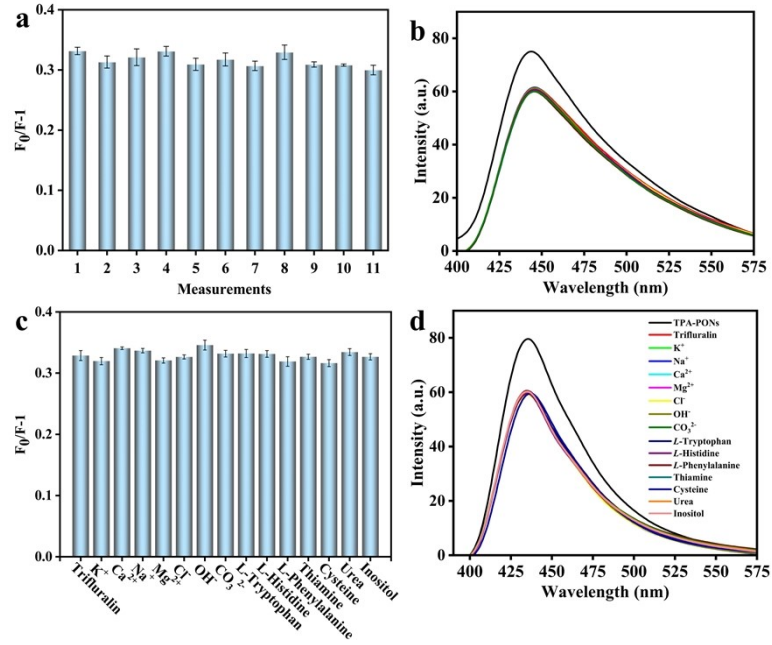

Fig.S5 (a, b) Fluorescence response of the same TPA-PONs suspension for 11 repeated measurements; (c, d) Effects of inorganic ions and organics on trifluralin detection. ( $\lambda_{ex} = 358 \text{ nm}$ ).

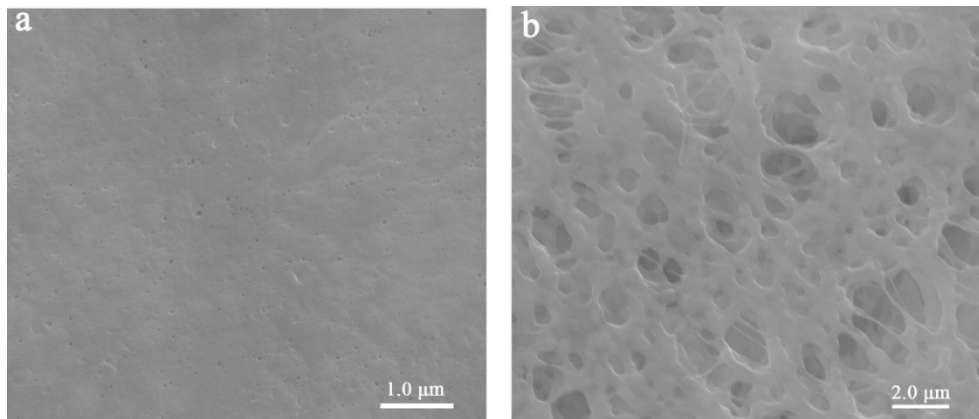

Fig.S6 The SEM images of polymer films before (a) and after (b) doping TPA-PONs
